# Supplementary material for: A gridded multi-site precipitation generator for complex terrain: an evaluation in the Austrian Alps
Source: Copernicus journal article supplement (doi:10.5194/hess-27-2123-2023), 2023-06-07
Supplement: Supplementary file 1 [file hess-27-2123-2023-supplement.pdf]

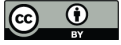

*Supplement of*

## **A gridded multi-site precipitation generator for complex terrain: an evaluation in the Austrian Alps**

**Hetal P. Dabhi et al.**

*Correspondence to:* Mathias W. Rotach ([mathias.rotach@uibk.ac.at](mailto:mathias.rotach@uibk.ac.at))

The copyright of individual parts of the supplement might differ from the article licence.

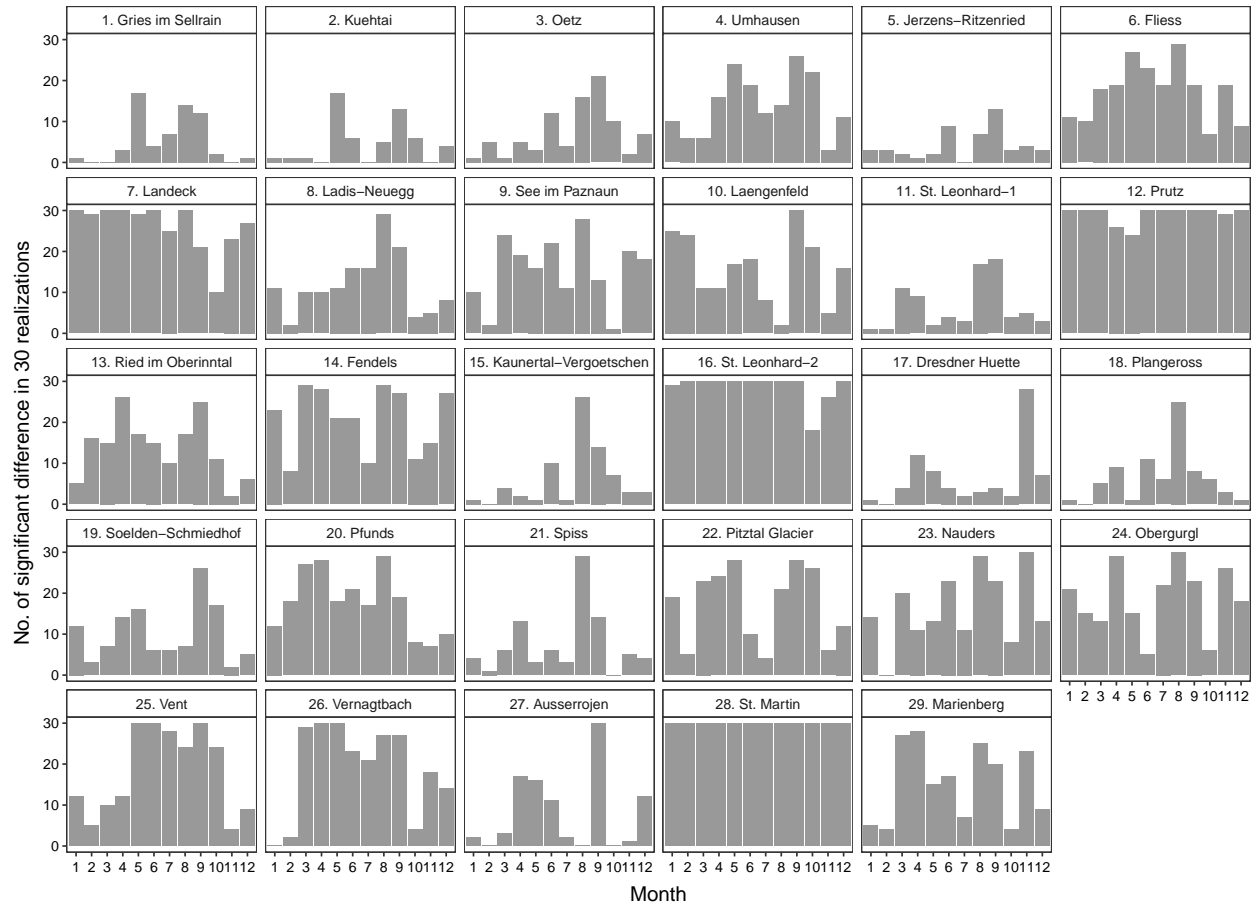

Figure S1: No. of significant differences in the KS-test between observed and simulated distributions in the 30 realizations at all 29 stations.

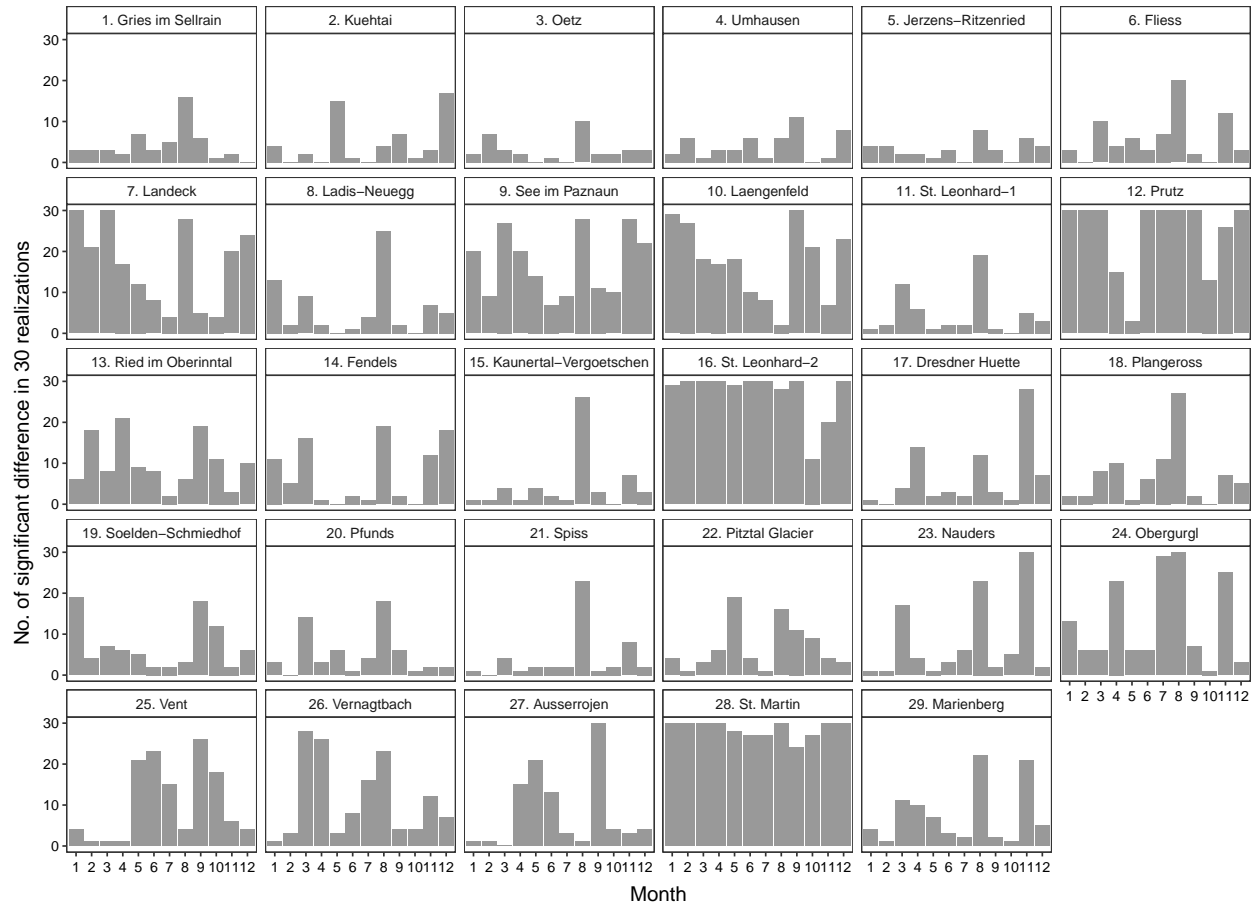

Figure S2: No. of significant differences in the WMW-test between observed and simulated distributions in the 30 realizations at all 29 stations.

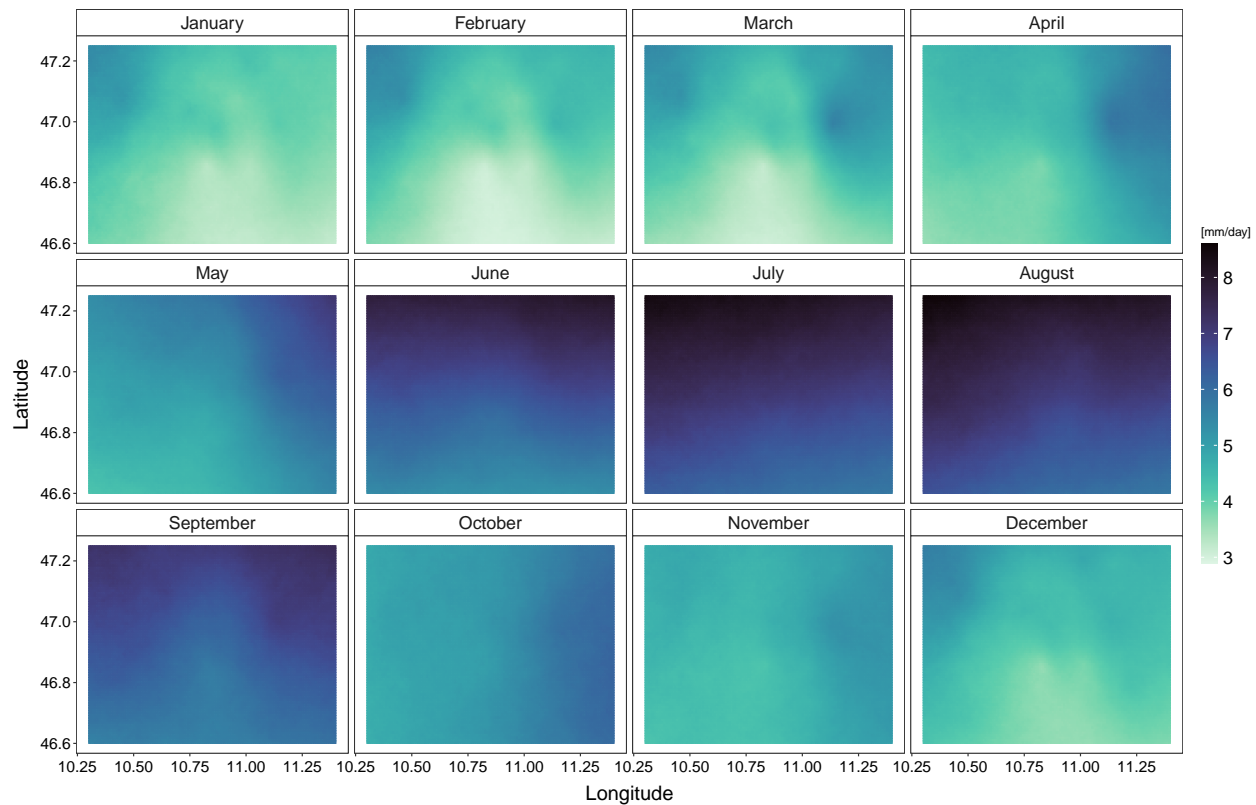

Figure S3: Spatial distribution of mean wet-day daily precipitation amount [mm/day] for each month in case of Aniso-OK

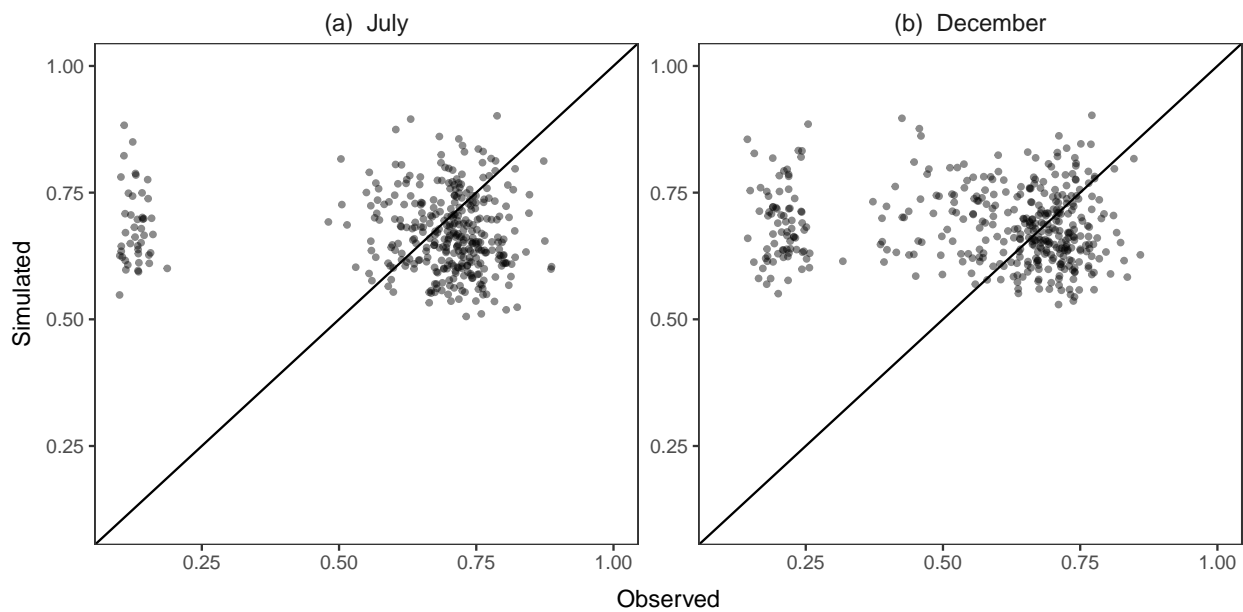

Figure S4: Inter-station correlations among the 29 stations in a summer month (June) and a winter month (December) for the occurrence of precipitation in the observed and simulated data.

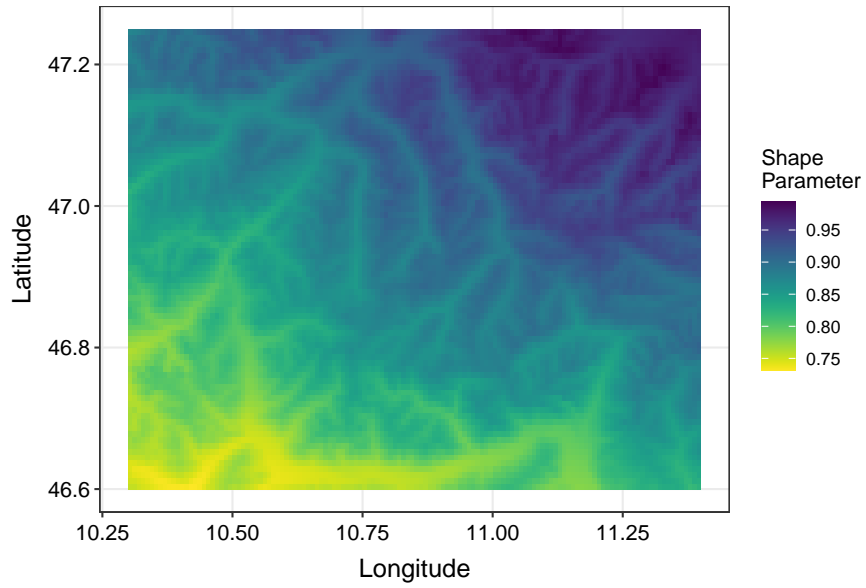

Figure S5: Shape parameters of gamma distribution over the region after interpolation

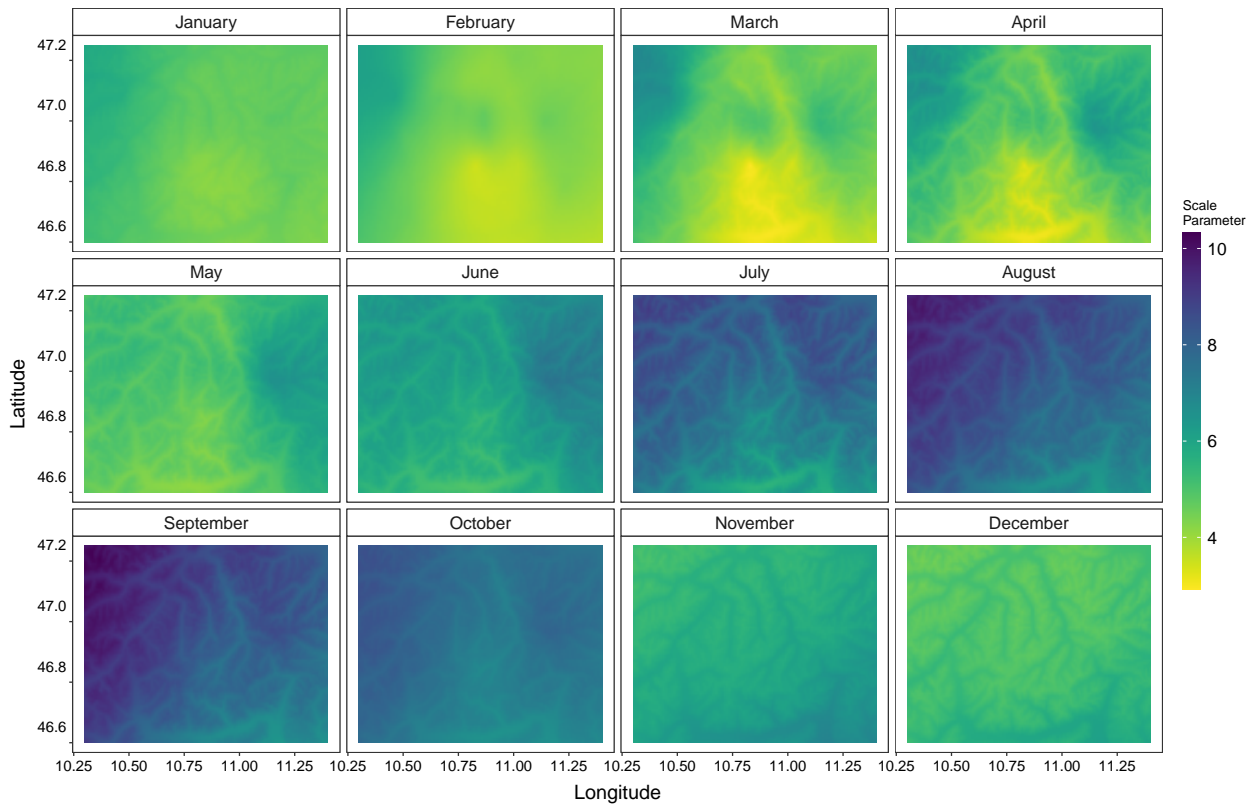

Figure S6: Scale parameters of gamma distribution for each month over the region after interpolation
